# Supplementary material for: Full-Length Transcriptome Analysis of Plasmodium falciparum by Single-Molecule Long-Read Sequencing
Source: Front Cell Infect Microbiol. 2021 Feb 23;11:631545. doi: 10.3389/fcimb.2021.631545 (PMC7942025; doi:10.3389/fcimb.2021.631545)
Supplement: Supplementary file 7 [file Table_3.xlsx]

## Sheet: Sheet1
Supplementary Table 3. The alternative splicing events detected by PacBio transcriptome sequencing
Gene ID	type	annotation
PF3D7_0205900	RI	26S proteasome regulatory subunit RPN1, putative
PF3D7_1321500	A3	3',5'-cyclic nucleotide phosphodiesterase, putative
PF3D7_1321500	A3	3',5'-cyclic nucleotide phosphodiesterase, putative
PF3D7_1135900	RI	3-oxo-5-alpha-steroid 4-dehydrogenase, putative
PF3D7_1447000	A5	40S ribosomal protein S5
PF3D7_0721600	A3	40S ribosomal protein S5, putative
PF3D7_1342000	A3	40S ribosomal protein S6
PF3D7_1302800	A3	40S ribosomal protein S7, putative
PF3D7_0210100	A5	60S ribosomal protein L37ae, putative
PF3D7_0210100	A5	60S ribosomal protein L37ae, putative
PF3D7_0507100	A5	60S ribosomal protein L4
PF3D7_1129500	A5	A/G-specific adenine glycosylase, putative
PF3D7_0319700	A5	ABC transporter I family member 1, putative
PF3D7_1246200	A3	actin I
PF3D7_1412500	RI	actin II
PF3D7_1118800	A3	actin-related protein 2/3 complex subunit 1, putative
PF3D7_1020900	A5	ADP-ribosylation factor
PF3D7_0526200	A3	ADP-ribosylation factor GTPase-activating protein, putative
PF3D7_0526200	A3	ADP-ribosylation factor GTPase-activating protein, putative
PF3D7_0405200	A3	ag-1 blood stage membrane protein homologue
PF3D7_0403800	A5	alpha/beta hydrolase, putative
PF3D7_0805000	A5	alpha/beta hydrolase, putative
PF3D7_0509000	RI	alpha-soluble NSF attachment protein, putative
PF3D7_1219600	A3	aminophospholipid-transporting P-ATPase
PF3D7_1329400	A3	AMP deaminase, putative
PF3D7_1410800	RI	ankyrin-repeat protein, putative
PF3D7_1038000	A3	antigen UB05
PF3D7_1038000	A3	antigen UB05
PF3D7_0528100	A5	AP-1 complex subunit beta, putative
PF3D7_1218300	A3	AP-2 complex subunit mu, putative
PF3D7_0730300	A5	AP2 domain transcription factor AP2-L, putative	The highlighted alternative splicing (AS) events were visualized in Supplementary Figure 3.
PF3D7_0420300	RI	AP2 domain transcription factor, putative
PF3D7_0613800	A5	AP2 domain transcription factor, putative
PF3D7_1239200	AF	AP2 domain transcription factor, putative
PF3D7_1133400	A3	apical membrane antigen 1
PF3D7_1218600	A3	arginine--tRNA ligase
PF3D7_0414900	RI	armadillo-domain containing rhoptry protein
PF3D7_1435700	A3	ataxin-2 like protein, putative
PF3D7_1435700	A3	ataxin-2 like protein, putative
PF3D7_0217100	A5	ATP synthase F1, alpha subunit
PF3D7_1320100	A5	ATP-dependent Clp protease adapter protein ClpS
PF3D7_1445900	A5	ATP-dependent RNA helicase DDX5, putative
PF3D7_0209800	A3	ATP-dependent RNA helicase UAP56
PF3D7_1126700	A3	autophagy-related protein 23, putative
PF3D7_1248500	A5	bax inhibitor 1, putative
PF3D7_0520600	RI	bis(5'-nucleosyl)-tetraphosphatase [asymmetrical]
PF3D7_1234100	RI	bromodomain protein, putative
PF3D7_0715300	A3	calcium/calmodulin-dependent protein kinase, putative
PF3D7_0217500	A5	calcium-dependent protein kinase 1
PF3D7_1423600	A3	calcium-dependent protein kinase, putative
PF3D7_1308200	A5	carbamoyl phosphate synthetase
PF3D7_0107200	A3	carbon catabolite repressor protein 4, putative
PF3D7_1136500	A3	casein kinase 1
PF3D7_1136500	A3	casein kinase 1
PF3D7_0715900	A5	cation diffusion facilitator family protein, putative
PF3D7_1315600	RI	CDP-diacylglycerol--inositol 3-phosphatidyltransferase
PF3D7_0603800	RI	centrosomal protein CEP76, putative
PF3D7_0709000	RI	chloroquine resistance transporter
PF3D7_0628300	A5	choline/ethanolaminephosphotransferase, putative
PF3D7_1104200	RI	chromatin remodeling protein
PF3D7_1023900	A3	chromodomain-helicase-DNA-binding protein 1 homolog, putative
PF3D7_1135600	A5	condensin-2 complex subunit D3, putative
PF3D7_1448200	RI	condensin-2 complex subunit G2, putative
PF3D7_1007000	RI	conserved membrane protein, unknown function
PF3D7_0405600	A3	conserved Plasmodium membrane protein, unknown function
PF3D7_0725100	A3	conserved Plasmodium membrane protein, unknown function
PF3D7_0806700	A5	conserved Plasmodium membrane protein, unknown function
PF3D7_1019500	RI	conserved Plasmodium membrane protein, unknown function
PF3D7_1019500	RI	conserved Plasmodium membrane protein, unknown function
PF3D7_1021700	A5	conserved Plasmodium membrane protein, unknown function
PF3D7_1233400	RI	conserved Plasmodium membrane protein, unknown function
PF3D7_1427400	A5	conserved Plasmodium membrane protein, unknown function
PF3D7_1427400	A5	conserved Plasmodium membrane protein, unknown function
PF3D7_1411100	A3	conserved Plasmodium membrane protein, unknown function, unspecified product
PF3D7_1411100	A3	conserved Plasmodium membrane protein, unknown function, unspecified product
PF3D7_0108500	A3	conserved Plasmodium protein, unknown function
PF3D7_0203800	RI	conserved Plasmodium protein, unknown function
PF3D7_0210600	RI	conserved Plasmodium protein, unknown function
PF3D7_0211900	A5	conserved Plasmodium protein, unknown function
PF3D7_0217600	A5	conserved Plasmodium protein, unknown function
PF3D7_0307700	RI	conserved Plasmodium protein, unknown function
PF3D7_0313800	A5	conserved Plasmodium protein, unknown function
PF3D7_0411000	A5	conserved Plasmodium protein, unknown function
PF3D7_0418000	RI	conserved Plasmodium protein, unknown function
PF3D7_0418300	A3	conserved Plasmodium protein, unknown function
PF3D7_0506500	SE	conserved Plasmodium protein, unknown function
PF3D7_0510000	A3	conserved Plasmodium protein, unknown function
PF3D7_0526800	A5	conserved Plasmodium protein, unknown function
PF3D7_0527600	A5	conserved Plasmodium protein, unknown function
PF3D7_0604500	A5	conserved Plasmodium protein, unknown function
PF3D7_0609900	A5	conserved Plasmodium protein, unknown function
PF3D7_0615800	RI	conserved Plasmodium protein, unknown function
PF3D7_0617200	A5	conserved Plasmodium protein, unknown function
PF3D7_0624200	A3	conserved Plasmodium protein, unknown function
PF3D7_0713700	RI	conserved Plasmodium protein, unknown function
PF3D7_0717600	A3	conserved Plasmodium protein, unknown function
PF3D7_0718600	A5	conserved Plasmodium protein, unknown function
PF3D7_0720500	A3	conserved Plasmodium protein, unknown function
PF3D7_0810900	A3	conserved Plasmodium protein, unknown function
PF3D7_0810900	A3	conserved Plasmodium protein, unknown function
PF3D7_0811600	RI	conserved Plasmodium protein, unknown function
PF3D7_0819800	A3	conserved Plasmodium protein, unknown function
PF3D7_0828900	RI	conserved Plasmodium protein, unknown function
PF3D7_0908200	A3	conserved Plasmodium protein, unknown function
PF3D7_0908500	A3	conserved Plasmodium protein, unknown function
PF3D7_0908900	A3	conserved Plasmodium protein, unknown function
PF3D7_0915300	A5	conserved Plasmodium protein, unknown function
PF3D7_0916200	A3	conserved Plasmodium protein, unknown function
PF3D7_0926500	RI	conserved Plasmodium protein, unknown function
PF3D7_0928700	A5	conserved Plasmodium protein, unknown function
PF3D7_1013400	A3	conserved Plasmodium protein, unknown function
PF3D7_1025500	RI	conserved Plasmodium protein, unknown function
PF3D7_1029300	A5	conserved Plasmodium protein, unknown function
PF3D7_1037900	RI	conserved Plasmodium protein, unknown function
PF3D7_1120600	RI	conserved Plasmodium protein, unknown function
PF3D7_1125000	RI	conserved Plasmodium protein, unknown function
PF3D7_1125200	A5	conserved Plasmodium protein, unknown function
PF3D7_1128000	A5	conserved Plasmodium protein, unknown function
PF3D7_1128000	A5	conserved Plasmodium protein, unknown function
PF3D7_1128900	A3	conserved Plasmodium protein, unknown function
PF3D7_1136200	A3	conserved Plasmodium protein, unknown function
PF3D7_1136700	RI	conserved Plasmodium protein, unknown function
PF3D7_1136700	RI	conserved Plasmodium protein, unknown function
PF3D7_1207000	A5	conserved Plasmodium protein, unknown function
PF3D7_1209700	A3	conserved Plasmodium protein, unknown function
PF3D7_1210500	A5	conserved Plasmodium protein, unknown function
PF3D7_1223600	A5	conserved Plasmodium protein, unknown function
PF3D7_1224100	A3	conserved Plasmodium protein, unknown function
PF3D7_1225600	A5	conserved Plasmodium protein, unknown function
PF3D7_1226400	A5	conserved Plasmodium protein, unknown function
PF3D7_1227700	A5	conserved Plasmodium protein, unknown function
PF3D7_1229900	A3	conserved Plasmodium protein, unknown function
PF3D7_1229900	A3	conserved Plasmodium protein, unknown function
PF3D7_1231000	RI	conserved Plasmodium protein, unknown function
PF3D7_1246300	A5	conserved Plasmodium protein, unknown function
PF3D7_1249100	RI	conserved Plasmodium protein, unknown function
PF3D7_1252300	A3	conserved Plasmodium protein, unknown function
PF3D7_1302500	RI	conserved Plasmodium protein, unknown function
PF3D7_1303700	A5	conserved Plasmodium protein, unknown function
PF3D7_1319400	RI	conserved Plasmodium protein, unknown function
PF3D7_1321900	A3	conserved Plasmodium protein, unknown function
PF3D7_1328600	RI	conserved Plasmodium protein, unknown function
PF3D7_1329500	A3	conserved Plasmodium protein, unknown function
PF3D7_1332200	A5	conserved Plasmodium protein, unknown function
PF3D7_1336600	A3	conserved Plasmodium protein, unknown function
PF3D7_1337400	AF	conserved Plasmodium protein, unknown function
PF3D7_1338600	RI	conserved Plasmodium protein, unknown function
PF3D7_1348000	SE	conserved Plasmodium protein, unknown function
PF3D7_1348600	RI	conserved Plasmodium protein, unknown function
PF3D7_1349500	A3	conserved Plasmodium protein, unknown function
PF3D7_1366900	A3	conserved Plasmodium protein, unknown function
PF3D7_1368400	RI	conserved Plasmodium protein, unknown function
PF3D7_1406100	AF	conserved Plasmodium protein, unknown function
PF3D7_1409200	A5	conserved Plasmodium protein, unknown function
PF3D7_1409200	A5	conserved Plasmodium protein, unknown function
PF3D7_1411000	A3	conserved Plasmodium protein, unknown function
PF3D7_1411000	A3	conserved Plasmodium protein, unknown function
PF3D7_1412400	A5	conserved Plasmodium protein, unknown function
PF3D7_1413700	A3	conserved Plasmodium protein, unknown function
PF3D7_1416400	RI	conserved Plasmodium protein, unknown function
PF3D7_1431400	A3	conserved Plasmodium protein, unknown function
PF3D7_1440900	RI	conserved Plasmodium protein, unknown function
PF3D7_1444100	RI	conserved Plasmodium protein, unknown function
PF3D7_1445700	A5	conserved Plasmodium protein, unknown function
PF3D7_1446500	A5	conserved Plasmodium protein, unknown function
PF3D7_1446700	RI	conserved Plasmodium protein, unknown function
PF3D7_1451200	AF	conserved Plasmodium protein, unknown function
PF3D7_1452400	A5	conserved Plasmodium protein, unknown function
PF3D7_1453200	RI	conserved Plasmodium protein, unknown function
PF3D7_1458300	RI	conserved Plasmodium protein, unknown function
PF3D7_1459400	A3	conserved Plasmodium protein, unknown function
PF3D7_0903600	RI	conserved Plasmodium protein, unknown function, unspecified product
PF3D7_0903600	RI	conserved Plasmodium protein, unknown function, unspecified product
PF3D7_0307500	RI	conserved protein, unknown function
PF3D7_0318900	A3	conserved protein, unknown function
PF3D7_0619000	A3	conserved protein, unknown function
PF3D7_0619000	A3	conserved protein, unknown function
PF3D7_0709900	A3	conserved protein, unknown function
PF3D7_0908300	A5	conserved protein, unknown function
PF3D7_0908300	A5	conserved protein, unknown function
PF3D7_1202600	A5	conserved protein, unknown function
PF3D7_1456900	A5	conserved protein, unknown function
PF3D7_1212600	A3	conserved protein, unknown function, unspecified product
PF3D7_1212600	A3	conserved protein, unknown function, unspecified product
PF3D7_1429300	A5	CPW-WPC family protein
PF3D7_0918100	AF	cytochrome b5-like heme/steroid binding protein, putative
PF3D7_0928000	A5	cytochrome c oxidase subunit 6B, putative
PF3D7_0928000	A5	cytochrome c oxidase subunit 6B, putative
PF3D7_0113800	A5	DBL containing protein, unknown function
PF3D7_1220400	A3	debranching enzyme-associated ribonuclease, putative
PF3D7_1468500	A3	derlin-1
Gene ID	Type	Description
PF3D7_1324800	RI	dihydrofolate synthase/folylpolyglutamate synthase
PF3D7_0608000	A3	diphthine methyltransferase, putative
PF3D7_1405400	A5	DNA mismatch repair protein, putative
PF3D7_0411900	RI	DNA polymerase alpha catalytic subunit A
PF3D7_1421400	RI	DNA-directed RNA polymerase III subunit RPC6, putative
PF3D7_1104700	A3	DNA-directed RNA polymerase III subunit RPC8, putative
PF3D7_1104700	A3	DNA-directed RNA polymerase III subunit RPC8, putative
PF3D7_1364800	RI	DNA-directed RNA polymerases I, II, and III subunit RPABC1, putative
PF3D7_0201700	A5	DnaJ protein, putative
PF3D7_0523400	A5	DnaJ protein, putative
PF3D7_0919100	A3	DnaJ protein, putative
PF3D7_1136800	A5	DnaJ protein, putative
PF3D7_0806200	A3	Dpy-19-like C-mannosyltransferase, putative
PF3D7_0309000	A5	dual specificity protein phosphatase
PF3D7_1218500	A3	dynamin-like protein, putative
PF3D7_1403500	A5	dynein light chain, putative
PF3D7_1360700	A3	E3 SUMO-protein ligase PIAS, putative
PF3D7_0704600	RI	E3 ubiquitin-protein ligase
PF3D7_1025000	A5	EF-hand calcium-binding domain-containing protein, putative
PF3D7_1021400	RI	endomembrane protein 70, putative
PF3D7_1353600	RI	ER lumen protein retaining receptor
PF3D7_1301600	RI	erythrocyte binding antigen-140
PF3D7_1312900	A3	eukaryotic translation initation factor 4 gamma
PF3D7_0528200	A3	eukaryotic translation initiation factor 3 subunit E, putative
PF3D7_0815600	RI	eukaryotic translation initiation factor 3 subunit G, putative
PF3D7_1019000	A5	eukaryotic translation initiation factor subunit eIF2A, putative
PF3D7_1307000	A3	exosome complex component RRP40, putative
PF3D7_1001600	A5	exported lipase 2
PF3D7_1121600	A3	exported protein 1
PF3D7_1471100	RI	exported protein 2
PF3D7_1024800	A3	exported protein 3
PF3D7_0701400	A3	exported protein family 4, pseudogene
PF3D7_0910100	A3	exportin-7, putative
PF3D7_1364900	A3	ferrochelatase
PF3D7_0828600	SE	folate transporter 1
PF3D7_1219000	A3	formin 2
PF3D7_1444800	A3	fructose-bisphosphate aldolase
PF3D7_1253000	A3	gametocyte erythrocyte cytosolic protein
PF3D7_0936600	A3	gametocyte exported protein 5
PF3D7_1442500	RI	geranylgeranyl transferase type-2 subunit alpha, putative
PF3D7_1419300	A5	glutathione S-transferase
PF3D7_0604700	A3	glyoxalase I-like protein GILP
PF3D7_1210900	RI	GPI mannosyltransferase 1
PF3D7_1405100	RI	GTPase-activating protein, putative
PF3D7_1117700	AF	GTP-binding nuclear protein RAN/TC4
PF3D7_1358900	RI	GTP-binding protein, putative
PF3D7_1116800	A3	heat shock protein 101
PF3D7_0708800	A3	heat shock protein 110
PF3D7_0113700	A5	heat shock protein 40, type II
PF3D7_0501100	A5	heat shock protein 40, type II
PF3D7_0501100	A5	heat shock protein 40, type II
PF3D7_0917900	A3	heat shock protein 70
PF3D7_1134000	A5	heat shock protein 70
PF3D7_1234200	A5	helicase, putative, pseudogene
PF3D7_1011900	RI	heme oxygenase
PF3D7_1372200	A3	histidine-rich protein III
PF3D7_1322100	A5	histone-lysine N-methyltransferase SET2
PF3D7_1453700	A3	HSP90 co-chaperone p23
PF3D7_1012400	RI	hypoxanthine-guanine phosphoribosyltransferase
PF3D7_1471200	A3	inorganic anion exchanger, inorganic anion antiporter
PF3D7_0806600	RI	kinesin-like protein, putative
PF3D7_0201800	A5	knob associated heat shock protein 40
PF3D7_1439700	A5	leucine carboxyl methyltransferase, putative
PF3D7_0930200	A5	leucine-rich repeat protein
PF3D7_1032800	A3	leucine-rich repeat protein
PF3D7_1432400	RI	leucine-rich repeat protein
PF3D7_0622800	A3	leucine--tRNA ligase, putative
PF3D7_0107500	RI	lipid/sterol:H+ symporter
PF3D7_0500800	A5	mature parasite-infected erythrocyte surface antigen
PF3D7_1147800	A3	membrane associated erythrocyte binding-like protein
PF3D7_1147800	A3	membrane associated erythrocyte binding-like protein
PF3D7_0417500	A3	memo-like protein
PF3D7_0206800	A5	merozoite surface protein 2
PF3D7_0207000	A5	merozoite surface protein 4
PF3D7_0108400	SE	mitochondrial carrier protein, putative
PF3D7_0108400	SE	mitochondrial carrier protein, putative
PF3D7_1241600	A3	mitochondrial carrier protein, putative
PF3D7_0503600	A5	myosin B
PF3D7_0719200	A3	NIMA related kinase 4
PF3D7_0623100	A5	nuclear polyadenylated RNA-binding protein NAB2, putative
PF3D7_1347200	AF	nucleoside transporter 1
PF3D7_1146600	A3	oocyst rupture protein 1, putative
PF3D7_1459300	A3	OPA3-like protein, putative
PF3D7_1205100	A3	O-phosphoseryl-tRNA(Sec) selenium transferase, putative
PF3D7_1141700	A5	OTU domain-containing protein, putative
PF3D7_0626100	RI	oxidoreductase, short-chain dehydrogenase family, putative
PF3D7_0714300	A5	palmitoyltransferase DHHC4, putative
PF3D7_0528400	RI	palmitoyltransferase DHHC7
PF3D7_0205400	A3	PCI domain-containing protein, putative
PF3D7_1117600	SE	peptidyl-tRNA hydrolase ICT1
PF3D7_1117600	SE	peptidyl-tRNA hydrolase ICT1
PF3D7_1027300	A3	peroxiredoxin
PF3D7_1104000	A5	phenylalanine--tRNA ligase beta subunit
PF3D7_0618900	RI	phosphatidylinositol N-acetylglucosaminyltransferase subunit GPI1
PF3D7_0618900	RI	phosphatidylinositol N-acetylglucosaminyltransferase subunit GPI1
PF3D7_0110600	RI	phosphatidylinositol-4-phosphate 5-kinase
PF3D7_0927900	A5	phosphatidylserine decarboxylase
PF3D7_1343000	A3	phosphoethanolamine N-methyltransferase
PF3D7_0720700	A5	phosphoinositide-binding protein, putative
PF3D7_1013500	A5	phosphoinositide-specific phospholipase C
PF3D7_0209100	A3	phospholipase A2, putative
PF3D7_0814400	A5	phospholipase DDHD1, putative
PF3D7_0311700	RI	plasmepsin VI
PF3D7_1253100	A5	Plasmodium exported protein (PHISTa), unknown function
PF3D7_1201200	A3	Plasmodium exported protein (PHISTa-like), unknown function
PF3D7_0401800	A3	Plasmodium exported protein (PHISTb), unknown function
PF3D7_1252700	A3	Plasmodium exported protein (PHISTb), unknown function
PF3D7_1401600	A5	Plasmodium exported protein (PHISTb), unknown function
PF3D7_1148700	A3	Plasmodium exported protein (PHISTc), unknown function
PF3D7_0402400	A3	Plasmodium exported protein, unknown function
PF3D7_0830900	A5	Plasmodium exported protein, unknown function
PF3D7_1476900	AF	Plasmodium exported protein, unknown function, pseudogene
PF3D7_1455900	RI	polyprenol reductase, putative
PF3D7_1363400	A5	polyubiquitin binding protein, putative
PF3D7_1416900	RI	prefoldin subunit 2, putative
PF3D7_0106400	RI	pre-rRNA-processing protein TSR2, putative
PF3D7_0901900	A5	probable protein, unknown function
PF3D7_1035800	A5	probable protein, unknown function
PF3D7_0932200	RI	profilin
PF3D7_1337100	RI	protein kinase 6
PF3D7_0817500	A5	protein kinase c inhibitor-like protein, putative
PF3D7_0724600	RI	protein kinase, putative
PF3D7_1474700	A3	protein kinase, putative
PF3D7_0810300	AF	protein phosphatase PPM5, putative
PF3D7_1309200	A5	protein phosphatase PPM6, putative
PF3D7_0810500	RI	protein phosphatase PPM7, putative
PF3D7_1316800	RI	protein transport protein SEC20, putative
PF3D7_0214100	RI	protein transport protein SEC31
PF3D7_1472100	A5	protein transport protein YIP1, putative
PF3D7_1146900	A3	protein YIPF6, putative
PF3D7_1231100	A3	ras-related protein Rab-2
PF3D7_0903200	A5	ras-related protein RAB7
PF3D7_1116000	RI	rhoptry neck protein 4
PF3D7_0627900	A5	ribonuclease P protein subunit p29, putative
PF3D7_0615400	RI	ribonuclease, putative
PF3D7_1015800	A5	ribonucleoside-diphosphate reductase small chain, putative
PF3D7_1405800	RI	ribosome biogenesis protein BOP1, putative
PF3D7_1410900	RI	ribosome maturation protein SBDS, putative
PF3D7_0115600	A5	rifin
PF3D7_0401600	A3	rifin
PF3D7_0401600	A3	rifin
PF3D7_0421500	A5	rifin, pseudogene
PF3D7_0215100	RI	RING zinc finger protein, putative
PF3D7_1020000	RI	RNA-binding protein 34, putative
PF3D7_1360900	A3	RNA-binding protein, putative
PF3D7_1438100	A3	secretory complex protein 62
PF3D7_0207700	RI	serine repeat antigen 4
PF3D7_0207600	A3	serine repeat antigen 5
PF3D7_0207500	A3	serine repeat antigen 6
PF3D7_0517300	RI	serine/arginine-rich splicing factor 1
PF3D7_0805700	RI	serine/threonine protein kinase, FIKK family
PF3D7_0902300	A3	serine/threonine protein kinase, FIKK family
PF3D7_0214600	A5	serine/threonine protein kinase, putative
PF3D7_1450000	RI	serine/threonine protein kinase, putative
PF3D7_0320700	A5	signal peptidase complex subunit SPC2, putative
PF3D7_1457000	A3	signal peptide peptidase
PF3D7_0702400	A3	small exported membrane protein 1
PF3D7_1303200	A5	SNARE protein, putative
PF3D7_1303200	A5	SNARE protein, putative
PF3D7_1320500	A5	SNARE protein, putative
PF3D7_0624600	A3	SNF2 helicase, putative
PF3D7_1451800	A5	sortilin
PF3D7_1238600	A5	sphingomyelin phosphodiesterase
PF3D7_0625000	A5	sphingomyelin synthase 1, putative
PF3D7_0625000	A5	sphingomyelin synthase 1, putative
PF3D7_0308900	A3	splicing factor 3B subunit 1, putative
PF3D7_0830500	A5	sporozoite and liver stage tryptophan-rich protein, putative
PF3D7_1338400	A5	SprT-like domain-containing protein, putative
PF3D7_1372500	A5	stevor, pseudogene
PF3D7_0308200	A3	T-complex protein 1 subunit eta
PF3D7_0608700	A3	T-complex protein 1 subunit zeta
PF3D7_1352500	A3	thioredoxin-related protein, putative
PF3D7_1027600	RI	topoisomerase, putative
PF3D7_0506800	A3	transcription factor 25, putative
PF3D7_1123400	A3	translation elongation factor EF-1, subunit alpha, putative
PF3D7_0209600	A5	transporter, putative
PF3D7_1218400	RI	triose or hexose phosphate/phosphate translocator, putative
PF3D7_0408900	A5	tRNA N6-adenosine threonylcarbamoyltransferase
PF3D7_0408900	A5	tRNA N6-adenosine threonylcarbamoyltransferase
PF3D7_0908700	RI	tRNA pseudouridine synthase, putative
PF3D7_1008700	RI	tubulin beta chain
PF3D7_1306900	A3	U1 small nuclear ribonucleoprotein A, putative
PF3D7_1402700	RI	U2 snRNP-associated SURP motif-containing protein, putative
PF3D7_1352200	A3	U3 small nucleolar RNA-associated protein 15, putative
PF3D7_1307100	A5	U3 small nucleolar RNA-associated protein 6, putative
PF3D7_1225800	SE	ubiquitin-activating enzyme E1
PF3D7_0606200	RI	ubiquitin-conjugating enzyme E2 PEX4, putative
PF3D7_0921000	SE	ubiquitin-conjugating enzyme E2, putative
PF3D7_0921000	SE	ubiquitin-conjugating enzyme E2, putative
PF3D7_1412900	A5	ubiquitin-conjugating enzyme E2, putative
PF3D7_1412900	A5	ubiquitin-conjugating enzyme E2, putative
PF3D7_0103000	A5	vacuolar protein sorting-associated protein VTA1, putative
PF3D7_0406100	A3	V-type proton ATPase subunit B
PF3D7_0934500	AF	V-type proton ATPase subunit E, putative
PF3D7_1347000	RI	WD repeat-containing protein 92, putative
PF3D7_0321800	A5	WD repeat-containing protein, putative
PF3D7_0510800	A3	WD repeat-containing protein, putative
PF3D7_1326100	RI	WD repeat-containing protein, putative
PF3D7_0807000	RI	YEATS domain-containing protein, putative
PF3D7_1315400	RI	zinc finger (CCCH type) protein, putative
PF3D7_0615600	A3	zinc finger protein, putative
